# Supplementary material for: Noncirrhotic hepatocellular carcinoma: etiology and occult hepatitis B virus infection in a hepatitis B virus-endemic area
Source: PubMed Central journal article supplement — Ther Adv Gastroenterol. 2017 May 22;10(7):529–36. doi: 10.1177/1756283X17710247 (PMC5484439; doi:10.1177/1756283x17710247), 2017-05-22
Supplement: Supplementary_1.pdf [file Supplementary_1.pdf]

**Supplement 1. Characteristics of hepatocellular carcinoma HCC in patients without liver cirrhosis**

| Characteristics       | HBV<br>(N = 105) | HCV<br>(N = 13) | Alcoholic<br>(N = 22) | Cryptogenic<br>(N = 38) | P*                 |
|-----------------------|------------------|-----------------|-----------------------|-------------------------|--------------------|
| Age ≤50 years         | 38 (26.2)        | 0 (0)           | 0 (0)                 | 7 (18.4)                | <0.01              |
| >50 years             | 67 (63.8)        | 13 (100.0)      | 22 (100)              | 31 (81.6)               |                    |
| Sex Male              | 91(86.7)         | 12 (92.3)       | 22 (100)              | 29 (76.3)               | 0.066              |
| female                | 14(13.3)         | 1 (7.7)         | 0 (0)                 | 9 (23.7)                |                    |
| Anti-HBc (+)          |                  | 9(69.2)         | 21(95.5)              | 30(78.9)                | 0.110              |
| Anti HBc (+) & OBI(+) |                  | 0               | 9(42.8)               | 18(60.0)                | 0.005              |
| Hyperglycemia         | 13 (12.4)        | 1 (7.7)         | 8 (36.4)              | 5 (13.2)                | 0.029              |
| Child–Pugh Class      |                  |                 |                       |                         |                    |
| A                     | 101 (96.2)       | 13 (100)        | 21 (95.5)             | 36 (94.7)               | 0.865              |
| B                     | 4 (3.8)          | 0 (0)           | 1 (4.5)               | 2 (5.3)                 |                    |
| C                     | 0 (0)            | 0 (0)           | 0 (0)                 | 0 (0)                   |                    |
| Mean BMI              | 23.5             | 21.5            | 23.5                  | 23.3                    | 0.109 <sup>c</sup> |
| Number of tumors      |                  |                 |                       |                         |                    |
| 1                     | 84 (80.0)        | 8 (61.5)        | 19 (86.4)             | 32 (84.2)               | 0.834 <sup>a</sup> |
| 2–3                   | 14 (13.3)        | 3 (23.1)        | 2 (9.1)               | 3 (7.9)                 |                    |
| ≥4                    | 7 (6.7)          | 2 (15.4)        | 1 (4.5)               | 3 (7.9)                 |                    |
| Tumor Size (cm)       |                  |                 |                       |                         |                    |
| ≤2                    | 8 (7.6)          | 3 (23.1)        | 2 (9.1)               | 3 (7.9)                 | 0.215 <sup>a</sup> |
| 2–5                   | 33 (31.4)        | 6 (46.2)        | 8 (36.4)              | 17 (44.7)               |                    |
| 5–10                  | 37 (35.2)        | 4 (30.8)        | 8 (36.4)              | 8 (21.1)                |                    |
| >10                   | 27 (25.7)        | 0 (0)           | 4 (18.2)              | 10 (26.3)               |                    |
| PV invasion           | 7 (6.7)          | 0(0)            | 0 (0)                 | 3 (7.9)                 | 0.445              |
| mUICC stage I         | 7 (6.7)          | 1 (7.7)         | 1 (4.5)               | 2 (5.3)                 | 0.749              |
| II                    | 79 (75.2)        | 11 (84.6)       | 19 (86.4)             | 33 (86.8)               |                    |
| III                   | 14 (13.3)        | 1 (7.7)         | 2 (9.1)               | 1 (2.6)                 |                    |
| IV                    | 5 (4.8)          | 0(0)            | 0(0)                  | 2 (5.3)                 |                    |
| AFP (ng/mL)           |                  |                 |                       |                         |                    |
| ≤20                   | 44(41.9)         | 11(84.6)        | 14(63.6)              | 23(60.5)                | 0.002 <sup>a</sup> |
| 20–400                | 11(10.5)         | 1(7.7)          | 3(13.6)               | 6(15.8)                 |                    |
| >400                  | 50(47.6)         | 1(7.7)          | 5(22.7)               | 9(23.7)                 |                    |

\*Chi-square test; <sup>a</sup>Non-parametric trend test; <sup>b</sup>analysis of variance

Abbreviations: HBV, hepatitis B virus; HCV, hepatitis C virus; HBc, HBV core; BMI, body mass index; PV, portal vein; mUICC, modified Union for International Cancer Control; AFP, alpha-fetoprotein; OBI, occult HBV infection
