# Supplementary material for: Noncirrhotic hepatocellular carcinoma: etiology and occult hepatitis B virus infection in a hepatitis B virus-endemic area
Source: PubMed Central journal article supplement — Ther Adv Gastroenterol. 2017 May 22;10(7):529–36. doi: 10.1177/1756283X17710247 (PMC5484439; doi:10.1177/1756283x17710247), 2017-05-22
Supplement: Supplementary_2.pdf [file Supplementary_2.pdf]

**Supplement 2. Viral load in the surgical specimens of patients with OBI**

| Etiology              | HBV DNA (IU/ml)                                                                               |                                                                                                                                |
|-----------------------|-----------------------------------------------------------------------------------------------|--------------------------------------------------------------------------------------------------------------------------------|
|                       | NCL                                                                                           | LC                                                                                                                             |
| HCV                   | Not detected                                                                                  | Not detected                                                                                                                   |
| Alcoholic (n=14)      | 17, 20, 22, 30, 110, 297, 438, 724, 6164                                                      | 136, 158, 199, 454, 736                                                                                                        |
| Cryptogenic<br>(n=41) | 28, 58, 60, 69, 112, 152, 162, 183, 231, 340,<br>363, 376, 363, 407, 441, 879, 2143,<br>13588 | 21, 37, 77, 110, 111, 223, 255, 255, 266<br>292, 305, 351, 444, 1144, 1554, 1576<br>2110, 2298, 2726, 2765, 3055, 3099<br>4329 |

OBI, occult hepatitis B infection; HBV, hepatitis B virus; HCV hepatitis C virus; NCL, non-cirrhotic liver;

LC, liver cirrhosis
